# Supplementary material
Source: PubMed Central journal article supplement (PMC7577166)

**Supplemental Table 1.** PAP-AUC ratios and heteroresistance status of clinical isolates in this study.

| <b>Isolate</b> | <b>PAP-AUC</b> | <b>PAP-AUC Ratio</b> | <b>Heteroresistant</b> |
|----------------|----------------|----------------------|------------------------|
| A01            | 0.95           | 0.36                 | No                     |
| A02            | 1.35           | 0.51                 | No                     |
| A03            | 0.88           | 0.33                 | No                     |
| A04            | 5.38           | 2.04                 | Yes                    |
| A06            | 0.13           | 0.05                 | No                     |
| A08            | 0.3            | 0.11                 | No                     |
| A09            | 1.21           | 0.46                 | No                     |
| A10            | 0.01           | 0.01                 | No                     |
| A11            | 0.03           | 0.01                 | No                     |
| A12            | 4.05           | 1.53                 | Yes                    |
| A13            | 7.05           | 2.67                 | Yes                    |
| A14            | 0.68           | 0.26                 | No                     |
| A15            | 0.9            | 0.34                 | No                     |
| A15            | 0.9            | 0.34                 | No                     |
| A16            | 3.58           | 1.36                 | Yes                    |
| A17            | 0.6            | 0.23                 | No                     |
| A18            | 8.15           | 3.09                 | Yes                    |
| A20            | 7.78           | 2.95                 | Yes                    |
| A21            | 3.7            | 1.4                  | Yes                    |
| A22            | 2.4            | 0.91                 | Yes                    |
| A23            | 0.23           | 0.09                 | No                     |
| A24            | 2.6            | 0.99                 | Yes                    |
| A25            | 5.63           | 2.13                 | Yes                    |
| A26            | 0.65           | 0.25                 | No                     |
| A27            | 0.53           | 0.2                  | No                     |
| A28            | 2.23           | 0.84                 | No                     |
| A32            | 1              | 0.38                 | No                     |
| B01            | 5.9            | 0.61                 | No                     |
| B02            | 5.48           | 0.56                 | No                     |
| B03            | 0.2            | 0.02                 | No                     |
| B05            | 5.1            | 0.52                 | No                     |
| B06            | 6.25           | 0.64                 | No                     |
| B08            | 14.2           | 1.45                 | Yes                    |
| B09            | 9.18           | 0.94                 | Yes                    |
| B10            | 5.83           | 0.6                  | No                     |
| B11            | 9.84           | 1.01                 | Yes                    |
| B12            | 4.95           | 0.51                 | No                     |
| B13            | 10.5           | 1.08                 | Yes                    |
| B14            | 12.1           | 1.24                 | Yes                    |
| B15            | 7.5            | 0.77                 | No                     |
| B16            | 5.03           | 0.52                 | No                     |
| B17            | 8.63           | 0.88                 | No                     |
| B18            | 13.9           | 1.42                 | Yes                    |
| B20            | 2.6            | 0.27                 | No                     |
| B24            | 0.05           | 0.01                 | No                     |

| <b>Isolate</b> | <b>PAP-AUC</b> | <b>PAP-AUC Ratio</b> | <b>Heteroresistant</b> |
|----------------|----------------|----------------------|------------------------|
| <b>B25</b>     | 4.6            | 0.47                 | No                     |
| <b>B27</b>     | 15             | 1.54                 | Yes                    |
| <b>B28</b>     | 0.95           | 0.1                  | No                     |
| <b>B29</b>     | 10.2           | 1.04                 | Yes                    |
| <b>B30</b>     | 9.95           | 1.02                 | Yes                    |
| <b>B31</b>     | 17.9           | 1.83                 | Yes                    |
| <b>B32</b>     | 1.68           | 0.17                 | No                     |
| <b>B35</b>     | 3.53           | 0.36                 | No                     |
| <b>B36</b>     | 4.78           | 0.49                 | No                     |
| <b>B37</b>     | 1.7            | 0.17                 | No                     |
| <b>B38</b>     | 4.5            | 0.46                 | No                     |
| <b>B39</b>     | 20.3           | 2.08                 | Yes                    |
| <b>B40</b>     | 0.02           | 0                    | No                     |
| <b>B41</b>     | 11             | 1.13                 | Yes                    |
| <b>B42</b>     | 17.2           | 1.76                 | Yes                    |
| <b>B43</b>     | 2.23           | 0.23                 | No                     |
| <b>B44</b>     | 13.1           | 1.34                 | Yes                    |

PAP-AUC, population analysis profile area under the curve ( $\times 10^8$  CFU. $\mu$ g/mL<sup>2</sup>); PAP-AUC ratio, compared to Mu3

**Supplemental Table 2.** Mutations in *rpoB* and *walK* in *S. epidermidis* strains

| <b>Sample #</b> | <b>Gene (Locus #)</b>       | <b>Heteroresistant</b> | <b>Mutations</b> |
|-----------------|-----------------------------|------------------------|------------------|
| <b>A8</b>       | <i>rpoB</i> (SE1UMMC_00965) | No                     | N651I            |
| <b>B25</b>      | <i>rpoB</i> (SE1UMMC_00965) | No                     | N651I            |
| <b>A2</b>       | <i>rpoB</i> (SE1UMMC_00965) | No                     | V987I            |
| <b>B5</b>       | <i>rpoB</i> (SE1UMMC_00965) | No                     | V987I; *1184Y    |
| <b>B7</b>       | <i>rpoB</i> (SE1UMMC_00965) | No                     | V987I; *1184Y    |
| <b>A16</b>      | <i>rpoB</i> (SE1UMMC_00965) | Yes                    | D471E; I527M     |
| <b>A24</b>      | <i>rpoB</i> (SE1UMMC_00965) | Yes                    | N651I            |
| <b>B9</b>       | <i>rpoB</i> (SE1UMMC_00965) | Yes                    | P940S            |
| <b>B18</b>      | <i>walK</i> (SE1UMMC_12990) | Yes                    | I306F            |
| <b>B11</b>      | <i>walK</i> (SE1UMMC_12990) | Yes                    | R286S            |

**Supplemental Figure 1.** Population analysis profiles for evaluable isolates.

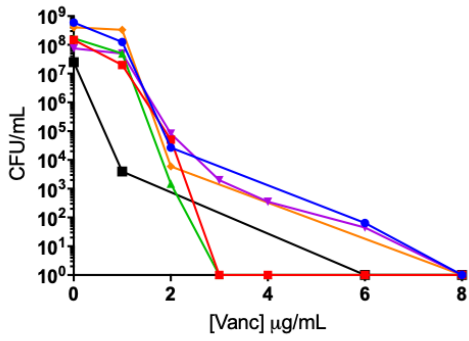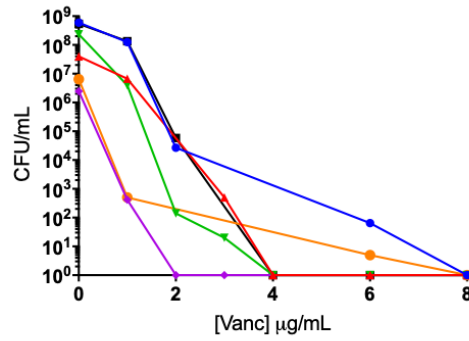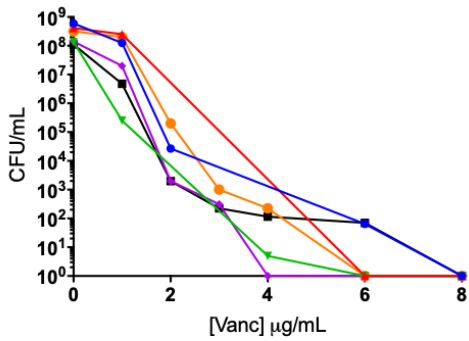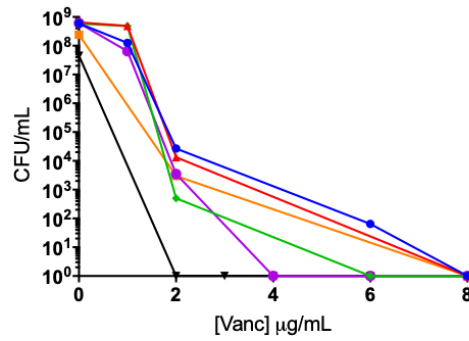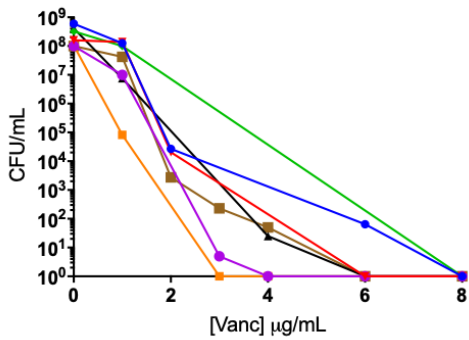

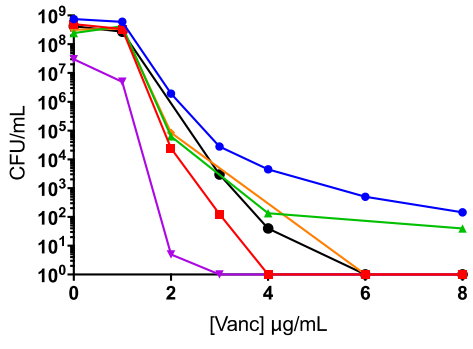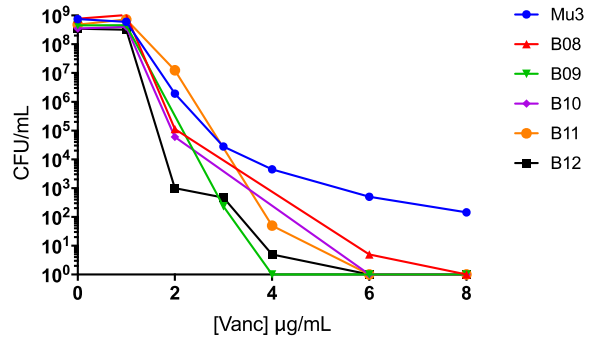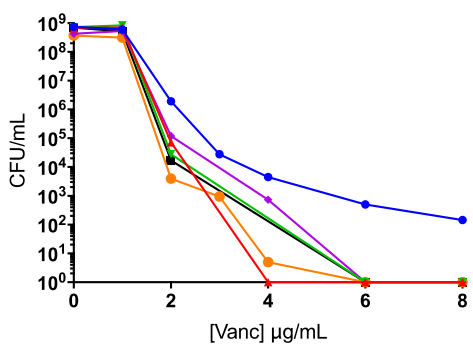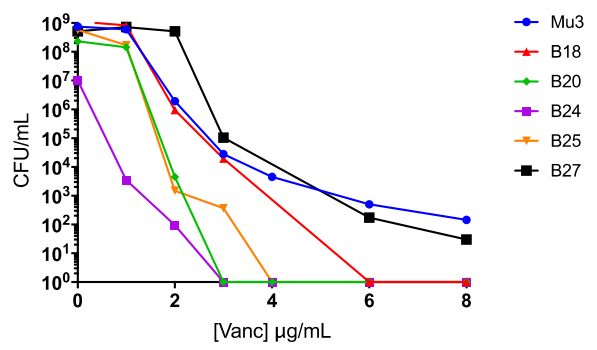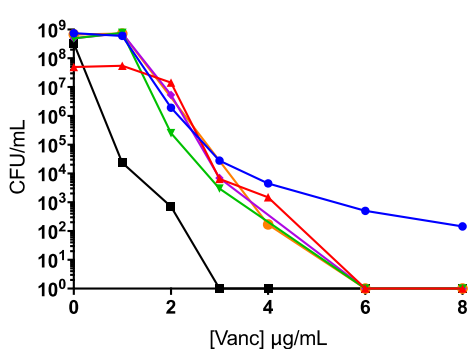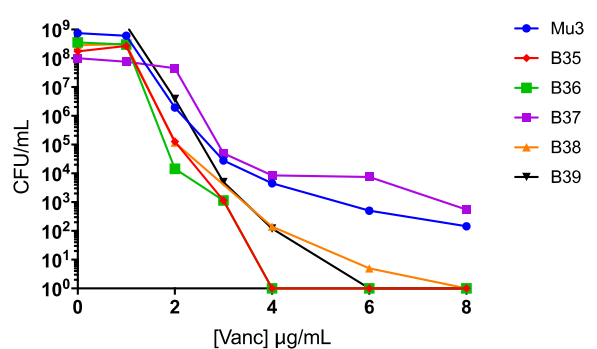

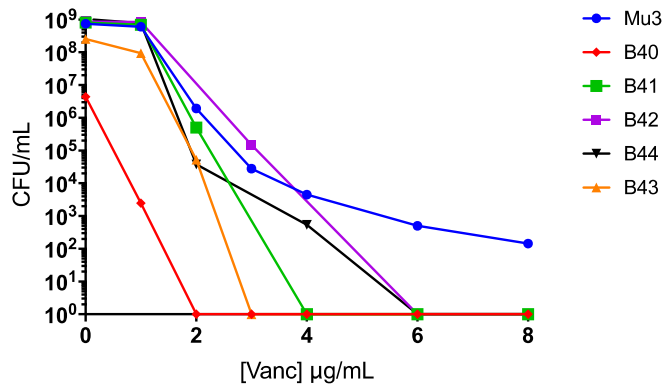

**Supplemental Figure 2.** Histogram showing PAP-AUC ratios for evaluable isolates

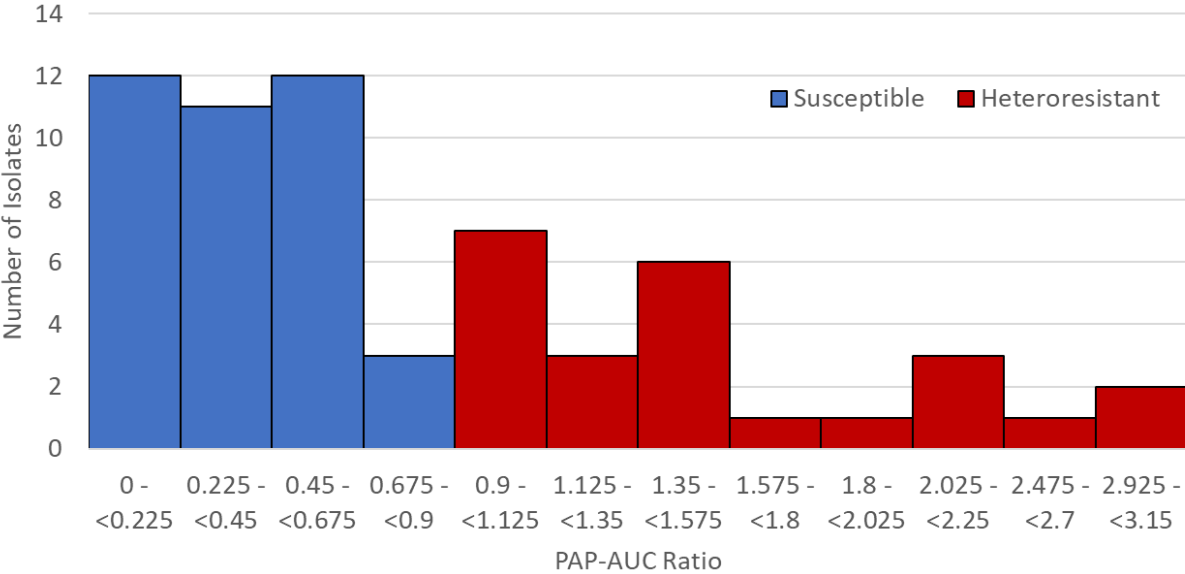

Supplement: AAC.00944-20-s0001.pdf [file AAC.00944-20-s0001.pdf]
